# Supplementary material for: Revisiting the Self-Confidence and Sport Performance Relationship: A Systematic Review with Meta-Analysis
Source: MDPI journal article supplement (doi:10.3390/ijerph19116381), 2022-05-24
Supplement: s1 [file s1]

## Supplement 1. Search strategy

The screenshot displays the EBSCOhost search interface. At the top, a blue navigation bar contains links for 'New Search', 'Subjects', 'Publications', 'Images', and 'Indexes'. Below this, the EBSCOhost logo is on the left, and the search status is shown as 'Searching: APA PsycArticles, APA PsycInfo, ERIC, Psychology and Behavioral Sciences Collection, SPORTDiscus with Full Text'. To the right of the status are links for 'Show Less' and 'Choose Databases'. The search area features three input boxes, each preceded by an 'AND' dropdown menu. The first box contains 'CSAI-2', the second 'sports performance', and the third 'competitive'. Each box has a 'Select a Field (optional)' dropdown to its right. A green 'Search' button is positioned to the right of the first box. Below the search boxes are links for 'Basic Search', 'Advanced Search', and 'Search History'. On the far right of the search area are 'Clear' and '?' links, and a set of '+' and '-' buttons for managing the search list.

1. EBSCO
2. APA PsycArticles, APA PsycInfo
3. Advanced ERIC, Psychology and Behavioral Sciences Collection, SPORTDiscus
4. Typed key terms
5. CSAI-2 Box 1
6. Sport performance Box 2
7. Competitive Box 3
8. Limit to: scholarly peer-reviewed journals
9. Page options: 50
10. Limit time: 2002-2020 [computer changed to 2003]
11. Started new search focused on Trait Sport Confidence Inventory
12. Same EBSCO databases
13. TSCI Box 1
14. Sport performance Box 2
15. Competitive Box 3
16. Limit to: scholarly peer-reviewed journals
17. 2 results from 1991-2001
18. Trait-Sport Confidence Inventory Box 1
19. Page options: 50
20. 65 results from 1985-2021
21. Changed to 2016-2021
22. 29 results
23. Confidence Box 1
24. Sport performance Box 2
25. Competitive Box 3
26. 313 results

27. Limit to: scholarly peer-reviewed journals
28. Page options: 50
29. Changed to 2020-2021
30. 29 results
31. Changed to 2018-2019
32. 37 results
33. Confidence Box 1
34. Sport performance Box 2
35. Competitive Box 3
36. Change to 2016-2017
37. Limit to: scholarly peer-reviewed journals
38. Page options: 50
39. 31 results
40. Change to 2014-2015
41. 51 results
42. 2012-2013
43. 24 results
44. 2010-2011
45. 16 results
46. 2008-2009
47. 11 results
48. 2006-2007
49. 8 results
50. 1983-1989
51. 5 results
52. 1990-1992
53. 7 results
54. 1993-1995
55. 9 results
56. 1996-1998
57. 20 results
58. 1999-2000
59. 7 results
60. 2001-2003

61. 8 results

62. 2004-2005

63. 19 results

**Supplement 2.** Risk of individual study bias ratings

| Study                      | Sample | Random selection | Nonresponse | Direct collection | Confidence measure | Sport measure | Data collection | Anonymity | Time | Total Score | Grouping |
|----------------------------|--------|------------------|-------------|-------------------|--------------------|---------------|-----------------|-----------|------|-------------|----------|
| Armes Alejo [37]           | 3      | 1                | 3           | 3                 | 2                  | 3             | 3               | 2         | 1    | 21          | M        |
| Barnes et al. [38]         | 3      | 1                | 3           | 3                 | 2                  | 3             | 3               | 3         | 2    | 23          | H        |
| Beattie et al. [39]        | 3      | 1                | 3           | 3                 | 3                  | 3             | 3               | 1         | 2    | 22          | H        |
| Bejek & Hagtvvet [8]       | 3      | 1                | 3           | 3                 | 3                  | 3             | 3               | 1         | 2    | 22          | H        |
| Bejek & Hagtvvet [8]       | 2      | 1                | 3           | 3                 | 3                  | 3             | 3               | 1         | 2    | 21          | M        |
| Bird & Horn [40]           | 2      | 1                | 2           | 3                 | 3                  | 1             | 3               | 2         | 2    | 19          | L        |
| Bueno et al. [41]          | 2      | 1                | 1           | 2                 | 2                  | 1             | 3               | 2         | 1    | 15          | L        |
| Burton [42]                | 3      | 1                | 3           | 3                 | 2                  | 3             | 3               | 1         | 2    | 21          | M        |
| Burton [42]                | 3      | 1                | 3           | 3                 | 2                  | 3             | 3               | 1         | 2    | 21          | M        |
| Chapman et al. [43]        | 2      | 1                | 3           | 3                 | 3                  | 3             | 3               | 1         | 2    | 21          | M        |
| Cox et al. [44]            | 1      | 1                | 3           | 3                 | 3                  | 2             | 3               | 3         | 3    | 22          | H        |
| Draper et al. [3]          | 2      | 1                | 3           | 3                 | 2                  | 3             | 3               | 2         | 3    | 22          | H        |
| Edwards & Hardy [45]       | 2      | 1                | 3           | 3                 | 2                  | 1             | 3               | 3         | 2    | 20          | L        |
| Gayton & Nickless [46]     | 2      | 1                | 1           | 3                 | 2                  | 3             | 3               | 1         | 3    | 19          | L        |
| Hassmén et al. [4]         | 3      | 1                | 3           | 3                 | 2                  | 3             | 3               | 2         | 2    | 22          | H        |
| Heazlewood & Burke [47]    | 2      | 1                | 3           | 3                 | 2                  | 3             | 3               | 1         | 1    | 19          | L        |
| Iso-Ahola & Blanchard [48] | 2      | 1                | 3           | 3                 | 1                  | 3             | 3               | 1         | 3    | 20          | L        |
| Jerome & Williams [9]      | 2      | 1                | 3           | 3                 | 2                  | 2             | 3               | 3         | 2    | 21          | M        |
| Jones et al. [49]          | 1      | 1                | 3           | 3                 | 2                  | 1             | 3               | 3         | 3    | 20          | L        |
| Kais et al. [50]           | 2      | 1                | 3           | 3                 | 3                  | 3             | 3               | 3         | 1    | 22          | H        |
| Kais et al. [10]           | 2      | 1                | 3           | 3                 | 3                  | 1             | 3               | 3         | 1    | 20          | L        |
| Laborde et al. [51]        | 1      | 1                | 3           | 3                 | 3                  | 2             | 3               | 2         | 3    | 21          | M        |
| Lautenbach et al. [52]     | 1      | 1                | 3           | 3                 | 2                  | 2             | 3               | 2         | 3    | 20          | L        |
| Levy et al. [53]           | 1      | 1                | 3           | 3                 | 3                  | 1             | 3               | 2         | 2    | 19          | L        |
| Martin et al. [54]         | 2      | 1                | 3           | 3                 | 2                  | 3             | 3               | 2         | 2    | 21          | M        |
| Maynard & Howe [55]        | 2      | 1                | 3           | 3                 | 2                  | 1             | 3               | 1         | 2    | 18          | L        |
| McAuley [7]                | 3      | 1                | 3           | 3                 | 2                  | 3             | 3               | 3         | 3    | 24          | H        |
| McCann et al. [56]         | 3      | 1                | 3           | 3                 | 2                  | 2             | 3               | 2         | 3    | 22          | H        |

|                             |      |      |      |      |      |      |      |      |      |       |   |
|-----------------------------|------|------|------|------|------|------|------|------|------|-------|---|
| Nicholls et al. [57]        | 2    | 1    | 3    | 3    | 3    | 1    | 3    | 2    | 1    | 19    | L |
| Perreault & Marisi [58]     | 3    | 1    | 2    | 3    | 3    | 2    | 3    | 1    | 2    | 20    | L |
| Pessoa da Costa et al. [59] | 2    | 1    | 3    | 3    | 2    | 2    | 3    | 2    | 2    | 20    | L |
| Pinto & Vázquez [60]        | 2    | 1    | 3    | 3    | 3    | 3    | 3    | 2    | 1    | 21    | M |
| Psychountaki & Zervas [61]  | 1    | 1    | 3    | 3    | 2    | 1    | 3    | 1    | 2    | 17    | L |
| Rodrigo et al. [62]         | 2    | 1    | 3    | 3    | 3    | 1    | 3    | 1    | 2    | 19    | L |
| Sanchez et al. [63]         | 3    | 1    | 3    | 3    | 3    | 3    | 3    | 2    | 2    | 23    | H |
| Swain & Jones [64]          | 3    | 1    | 3    | 3    | 3    | 3    | 3    | 1    | 2    | 22    | H |
| Terry & Slade [5]           | 2    | 1    | 3    | 3    | 2    | 3    | 3    | 3    | 2    | 22    | H |
| Terry & Youngs [65]         | 2    | 1    | 3    | 3    | 2    | 1    | 3    | 3    | 2    | 20    | L |
| Terry et al. [21]           | 3    | 1    | 3    | 3    | 2    | 3    | 3    | 3    | 2    | 23    | H |
| Totterdell [66]             | 3    | 1    | 2    | 3    | 1    | 2    | 3    | 1    | 3    | 19    | L |
| Tsopani et al. [67]         | 1    | 1    | 2    | 3    | 2    | 3    | 3    | 1    | 2    | 18    | L |
| Vadocz et al. [68]          | 3    | 1    | 3    | 3    | 3    | 3    | 3    | 2    | 1    | 22    | H |
| Zienius et al. [6]          | 2    | 1    | 3    | 3    | 2    | 3    | 3    | 2    | 3    | 22    | H |
| Mean                        | 2.19 | 1.00 | 2.81 | 2.97 | 2.35 | 2.30 | 3.00 | 1.88 | 2.06 | 20.58 |   |
| SD                          | 0.70 | 0.00 | 0.50 | 0.15 | 0.57 | 0.86 | 0.00 | 0.79 | 0.67 | 1.76  |   |

Number abbreviations: 3 = low risk of bias, 2 = medium risk of bias, 1 = high risk of bias; Letter abbreviations: H = higher quality study, M = medium quality study, L = low quality study.

### Supplement 3. Comparison of Results

| Analysis                          | Current Meta                                                         | Craft et al. [xx]      | Woodman and Hardy [xx] | Summary                                                |  |
|-----------------------------------|----------------------------------------------------------------------|------------------------|------------------------|--------------------------------------------------------|--|
|                                   | k, r [95% CI]                                                        | k, r [95% CI]          | k, r [95% CI]          |                                                        |  |
| Overall relationship              | 47, 0.25 [0.19, 0.31]                                                | 29, 0.25 [0.20, 0.28]  | 36, 0.27 [0.20, 0.33]  | Replicated                                             |  |
| Terry's sport propositions        |                                                                      |                        |                        |                                                        |  |
| Individual sport                  | 31, 0.29 [0.22, 0.35]                                                | 17, 0.49 [0.42, 0.56]* | ?, 0.25 [0.16, 0.34]   | Congruent with Woodman and Hardy [xx]                  |  |
| Team sport                        | 14, 0.14 [0.03, 0.25]                                                | 38, 0.19 [0.10, 0.29]* | ?, 0.19 [0.05, 0.34]   |                                                        |  |
| Closed skill                      | 24, 0.28 [0.19, 0.36]                                                | 34, 0.09 [0.01, 0.18]* | Not analyzed           |                                                        |  |
| Open skill                        | 21, 0.21 [0.12, 0.30]                                                | 21, 0.55 [0.49, 0.61]* | Not analyzed           | Incongruent                                            |  |
| Time of Confidence Administration |                                                                      |                        |                        |                                                        |  |
| <15 (15 min or less)              | 13, 0.25 [0.12, 0.37]                                                | 18, 0.20 [0.10, 0.30]* | Not analyzed           | Incongruent for the most, congruent only with >15 min. |  |
| 16-30                             | 9, 0.19 [0.02, 0.34]                                                 | 8, 0.44 [0.26, 0.61]*  | Not analyzed           |                                                        |  |
| 31-59 (60)                        | 19, 0.25 [0.16, 0.34]                                                | 11, 1.07 [0.98, 1.16]* | Not analyzed           |                                                        |  |
| >1 (1-4 hrs.)                     | 6, 0.30 [0.15, 0.44]                                                 | 10, 0.16 [0.06, 0.25]* | Not analyzed           |                                                        |  |
| Individual differences            |                                                                      |                        |                        |                                                        |  |
| Male                              | 43, percent male meta-regression<br>R <sup>2</sup> = 0.24 (r = 0.49) | Not analyzed           | ?, 0.29 [0.18, 0.40]   |                                                        |  |

|                     |                                |                       |                       |                                                                                                                                            |
|---------------------|--------------------------------|-----------------------|-----------------------|--------------------------------------------------------------------------------------------------------------------------------------------|
| Female              |                                | Not analyzed          | ?, 0.04 [-0.05, 0.13] | Congruent, confidence-performance relationship greater, more important for males than females                                              |
| High standard       | 22, 0.20 [0.14, 0.27]          | Not analyzed          | ?, 0.33 [0.19, 0.47]  |                                                                                                                                            |
| Low standard        | 24, 0.26 [0.18, 0.34]          | Not analyzed          | ?, 0.16 [0.06, 0.25]  | Fairly consistent, I placed elite and college in the high standard group; all club, high school and recreational in the low standard group |
| Elite               | 14, 0.22 [0.10, 0.32]          | 17, 0.10 [0.01, 0.21] | Not analyzed          |                                                                                                                                            |
| College             | 8, 0.21 [0.08, 0.34]           | 16, 0.12 [0.01, 0.24] | Not analyzed          |                                                                                                                                            |
| European club       | 6, 0.20 [0.04, 0.34]           | 11, 1.24 [1.14, 1.33] | Not analyzed          |                                                                                                                                            |
| College PE students | Not in our inclusion criteria. | 9, 0.23 [0.09, 0.36]  |                       | European club way off, the rest are small effects for us and Craft et al.                                                                  |

---

\*Craft et al. [xx] values slope coefficients.

# Supplement 4. PRISMA Checklist

| Section and Topic             | Item # | Checklist item                                                                                                                                                                                                                                                                                       | Location where item is reported                    |
|-------------------------------|--------|------------------------------------------------------------------------------------------------------------------------------------------------------------------------------------------------------------------------------------------------------------------------------------------------------|----------------------------------------------------|
| <b>TITLE</b>                  |        |                                                                                                                                                                                                                                                                                                      |                                                    |
| Title                         | 1      | Identify the report as a systematic review.                                                                                                                                                                                                                                                          | Yes                                                |
| <b>ABSTRACT</b>               |        |                                                                                                                                                                                                                                                                                                      |                                                    |
| Abstract                      | 2      | See the PRISMA 2020 for Abstracts checklist.                                                                                                                                                                                                                                                         | Abstract written with MDPI 200 word limit in mind. |
| <b>INTRODUCTION</b>           |        |                                                                                                                                                                                                                                                                                                      |                                                    |
| Rationale                     | 3      | Describe the rationale for the review in the context of existing knowledge.                                                                                                                                                                                                                          | Introduction                                       |
| Objectives                    | 4      | Provide an explicit statement of the objective(s) or question(s) the review addresses.                                                                                                                                                                                                               | Section 1.1. Research questions                    |
| <b>METHODS</b>                |        |                                                                                                                                                                                                                                                                                                      |                                                    |
| Eligibility criteria          | 5      | Specify the inclusion and exclusion criteria for the review and how studies were grouped for the syntheses.                                                                                                                                                                                          | Section 2.1                                        |
| Information sources           | 6      | Specify all databases, registers, websites, organisations, reference lists and other sources searched or consulted to identify studies. Specify the date when each source was last searched or consulted.                                                                                            | Section 2.2                                        |
| Search strategy               | 7      | Present the full search strategies for all databases, registers and websites, including any filters and limits used.                                                                                                                                                                                 | Section 2.2                                        |
| Selection process             | 8      | Specify the methods used to decide whether a study met the inclusion criteria of the review, including how many reviewers screened each record and each report retrieved, whether they worked independently, and if applicable, details of automation tools used in the process.                     | Section 2.3                                        |
| Data collection process       | 9      | Specify the methods used to collect data from reports, including how many reviewers collected data from each report, whether they worked independently, any processes for obtaining or confirming data from study investigators, and if applicable, details of automation tools used in the process. | Section 2.4                                        |
| Data items                    | 10a    | List and define all outcomes for which data were sought. Specify whether all results that were compatible with each outcome domain in each study were sought (e.g. for all measures, time points, analyses), and if not, the methods used to decide which results to collect.                        | Section 2.4                                        |
|                               | 10b    | List and define all other variables for which data were sought (e.g. participant and intervention characteristics, funding sources). Describe any assumptions made about any missing or unclear information.                                                                                         | Section 2.4                                        |
| Study risk of bias assessment | 11     | Specify the methods used to assess risk of bias in the included studies, including details of the tool(s) used, how many reviewers assessed each study and whether they worked independently, and if applicable, details of automation tools used in the process.                                    | Section 2.5, 2.7                                   |
| Effect measures               | 12     | Specify for each outcome the effect measure(s) (e.g. risk ratio, mean difference) used in the synthesis or presentation of results.                                                                                                                                                                  | Section 2.6                                        |
| Synthesis methods             | 13a    | Describe the processes used to decide which studies were eligible for each synthesis (e.g. tabulating the study intervention characteristics and comparing against the planned groups for each synthesis (item #5)).                                                                                 | Section 2.6                                        |
|                               | 13b    | Describe any methods required to prepare the data for presentation or synthesis, such as handling of missing summary                                                                                                                                                                                 | Section 2.6                                        |



| Section and Topic             | Item # | Checklist item                                                                                                                                                                                                                                                                       | Location where item is reported                                                              |
|-------------------------------|--------|--------------------------------------------------------------------------------------------------------------------------------------------------------------------------------------------------------------------------------------------------------------------------------------|----------------------------------------------------------------------------------------------|
|                               |        | statistics, or data conversions.                                                                                                                                                                                                                                                     |                                                                                              |
|                               | 13c    | Describe any methods used to tabulate or visually display results of individual studies and syntheses.                                                                                                                                                                               | Section 2.6                                                                                  |
|                               | 13d    | Describe any methods used to synthesize results and provide a rationale for the choice(s). If meta-analysis was performed, describe the model(s), method(s) to identify the presence and extent of statistical heterogeneity, and software package(s) used.                          | Section 2.6                                                                                  |
|                               | 13e    | Describe any methods used to explore possible causes of heterogeneity among study results (e.g. subgroup analysis, meta-regression).                                                                                                                                                 | Section 2.6                                                                                  |
|                               | 13f    | Describe any sensitivity analyses conducted to assess robustness of the synthesized results.                                                                                                                                                                                         | Section 2.7                                                                                  |
| Reporting bias assessment     | 14     | Describe any methods used to assess risk of bias due to missing results in a synthesis (arising from reporting biases).                                                                                                                                                              | Study level reliability, Section 2.5                                                         |
| Certainty assessment          | 15     | Describe any methods used to assess certainty (or confidence) in the body of evidence for an outcome.                                                                                                                                                                                | Found in full in section 3.5, and table 5                                                    |
| <b>RESULTS</b>                |        |                                                                                                                                                                                                                                                                                      |                                                                                              |
| Study selection               | 16a    | Describe the results of the search and selection process, from the number of records identified in the search to the number of studies included in the review, ideally using a flow diagram.                                                                                         | Section 3.1                                                                                  |
|                               | 16b    | Cite studies that might appear to meet the inclusion criteria, but which were excluded, and explain why they were excluded.                                                                                                                                                          | Mentioned an example line 169-170, Excel sheet of other examples available from first author |
| Study characteristics         | 17     | Cite each included study and present its characteristics.                                                                                                                                                                                                                            | Section 3.1                                                                                  |
| Risk of bias in studies       | 18     | Present assessments of risk of bias for each included study.                                                                                                                                                                                                                         | Section 3.2                                                                                  |
| Results of individual studies | 19     | For all outcomes, present, for each study: (a) summary statistics for each group (where appropriate) and (b) an effect estimate and its precision (e.g. confidence/credible interval), ideally using structured tables or plots.                                                     | Section 3.3, Fig 2                                                                           |
| Results of syntheses          | 20a    | For each synthesis, briefly summarise the characteristics and risk of bias among contributing studies.                                                                                                                                                                               | Section 3.3                                                                                  |
|                               | 20b    | Present results of all statistical syntheses conducted. If meta-analysis was done, present for each the summary estimate and its precision (e.g. confidence/credible interval) and measures of statistical heterogeneity. If comparing groups, describe the direction of the effect. | Section 3.3, 3.4                                                                             |
|                               | 20c    | Present results of all investigations of possible causes of heterogeneity among study results.                                                                                                                                                                                       | Section 3.3                                                                                  |
|                               | 20d    | Present results of all sensitivity analyses conducted to assess the robustness of the synthesized results.                                                                                                                                                                           | Fig 3                                                                                        |
| Reporting biases              | 21     | Present assessments of risk of bias due to missing results (arising from reporting biases) for each synthesis assessed.                                                                                                                                                              | Section 3.3                                                                                  |
| Certainty of                  | 22     | Present assessments of certainty (or confidence) in the body of evidence for each outcome assessed.                                                                                                                                                                                  | Section 3.5, Table 5                                                                         |

| Section and Topic                              | Item # | Checklist item                                                                                                                                                                                                                             | Location where item is reported                                                     |
|------------------------------------------------|--------|--------------------------------------------------------------------------------------------------------------------------------------------------------------------------------------------------------------------------------------------|-------------------------------------------------------------------------------------|
| evidence                                       |        |                                                                                                                                                                                                                                            |                                                                                     |
| <b>DISCUSSION</b>                              |        |                                                                                                                                                                                                                                            |                                                                                     |
| Discussion                                     | 23a    | Provide a general interpretation of the results in the context of other evidence.                                                                                                                                                          | All points addressed in Discussion section                                          |
|                                                | 23b    | Discuss any limitations of the evidence included in the review.                                                                                                                                                                            |  |
|                                                | 23c    | Discuss any limitations of the review processes used.                                                                                                                                                                                      |                                                                                     |
|                                                | 23d    | Discuss implications of the results for practice, policy, and future research.                                                                                                                                                             |                                                                                     |
| <b>OTHER INFORMATION</b>                       |        |                                                                                                                                                                                                                                            |                                                                                     |
| Registration and protocol                      | 24a    | Provide registration information for the review, including register name and registration number, or state that the review was not registered.                                                                                             | All information for 24a-27 found from line 487 to start of references               |
|                                                | 24b    | Indicate where the review protocol can be accessed, or state that a protocol was not prepared.                                                                                                                                             |  |
|                                                | 24c    | Describe and explain any amendments to information provided at registration or in the protocol.                                                                                                                                            |                                                                                     |
| Support                                        | 25     | Describe sources of financial or non-financial support for the review, and the role of the funders or sponsors in the review.                                                                                                              |                                                                                     |
| Competing interests                            | 26     | Declare any competing interests of review authors.                                                                                                                                                                                         |                                                                                     |
| Availability of data, code and other materials | 27     | Report which of the following are publicly available and where they can be found: template data collection forms; data extracted from included studies; data used for all analyses; analytic code; any other materials used in the review. |                                                                                     |

From: Page MJ, McKenzie JE, Bossuyt PM, Boutron I, Hoffmann TC, Mulrow CD, et al. The PRISMA 2020 statement: an updated guideline for reporting systematic reviews. BMJ 2021;372:n71. doi: 10.1136/bmj.n71

- For more information, visit: <http://www.prisma-statement.org/>
